# Supplementary material for: Regularized survival learning and cross-database analysis enabled identification of colorectal cancer prognosis-related immune genes
Source: PubMed Central journal article supplement (PMC9995717; doi:10.3389/fgene.2023.1148470), 2023-02-23
Supplement: Image1.pdf [file Image1.pdf]

## Supplementary Material

# Regularized Survival Learning and Cross-database Analysis enabled Identification of Colorectal Cancer Prognosis-Related Immune Genes

Dongmei Ai\*, Mingmei Wang, Qingchuan Zhang, Longwei Cheng, Yishu Wang, Xiuqin Liu and Li C. Xia

\* Correspondence: Dongmei Ai: [aidongmei@ustb.edu.cn](mailto:aidongmei@ustb.edu.cn); Li C. Xia: [lcxia@scut.edu.cn](mailto:lcxia@scut.edu.cn)

### 1 Supplementary Figures

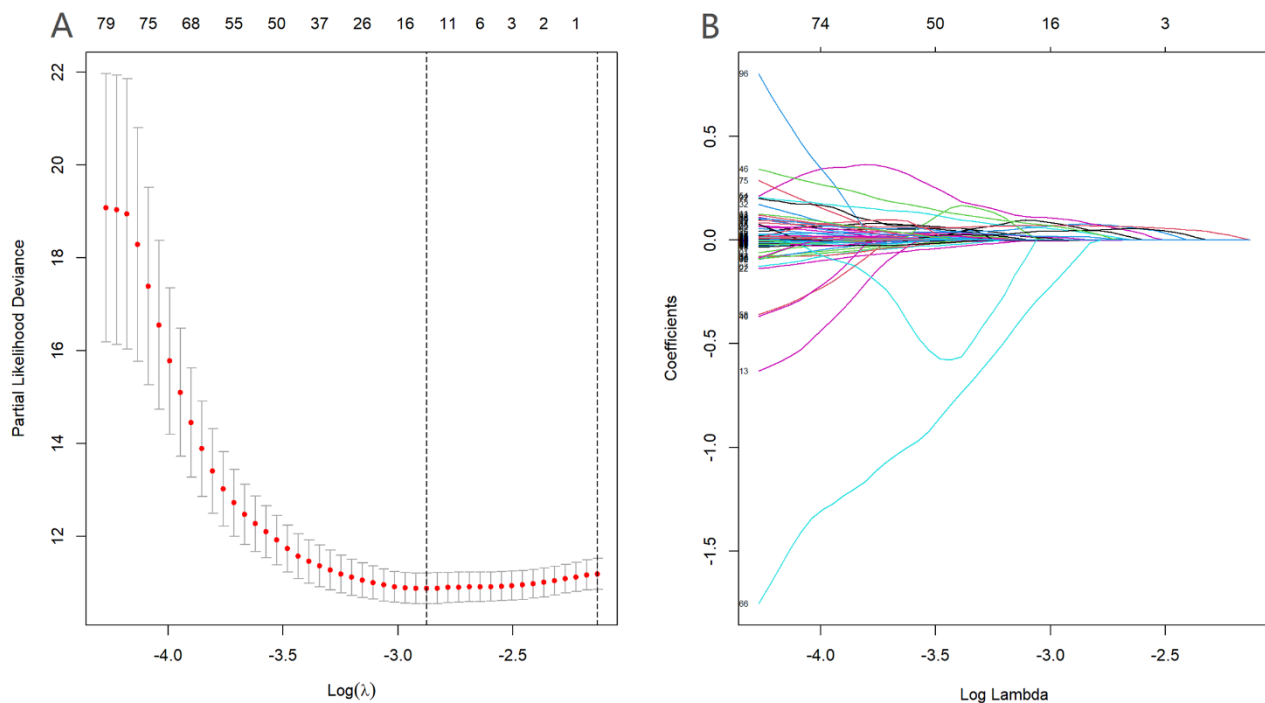

**Supplementary Figure S1.** The results of screening differentially expressed immune genes by LASSO regression. (A) The x-coordinate is the log lambda. The lambda value is a penalty coefficient, and lambda controls the complexity of LASSO regression. The y-coordinate is the cross-validation error. (B) The x-coordinate is the log lambda value; The y-coordinate is the coefficient. Each line represents a gene. If the coefficient of a gene is 0, then that gene is not included in the subsequent analysis.

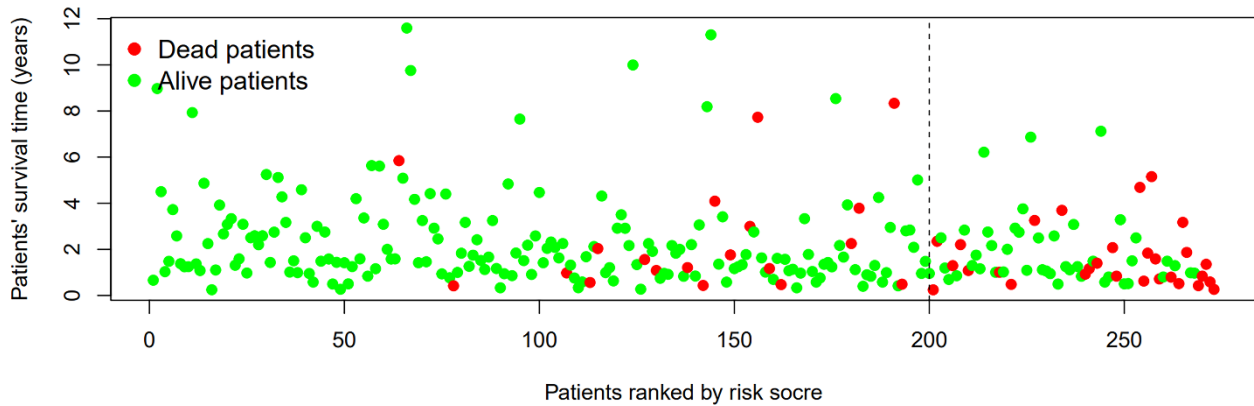

**Supplementary Figure S2.** Distribution of survival status in the TCGA training dataset. The x-coordinate is the sample, which is ranked by risk score from low to high. The y-coordinate represents the survival period of the sample. Green dots represent alive patients, while red dots represent dead patients.

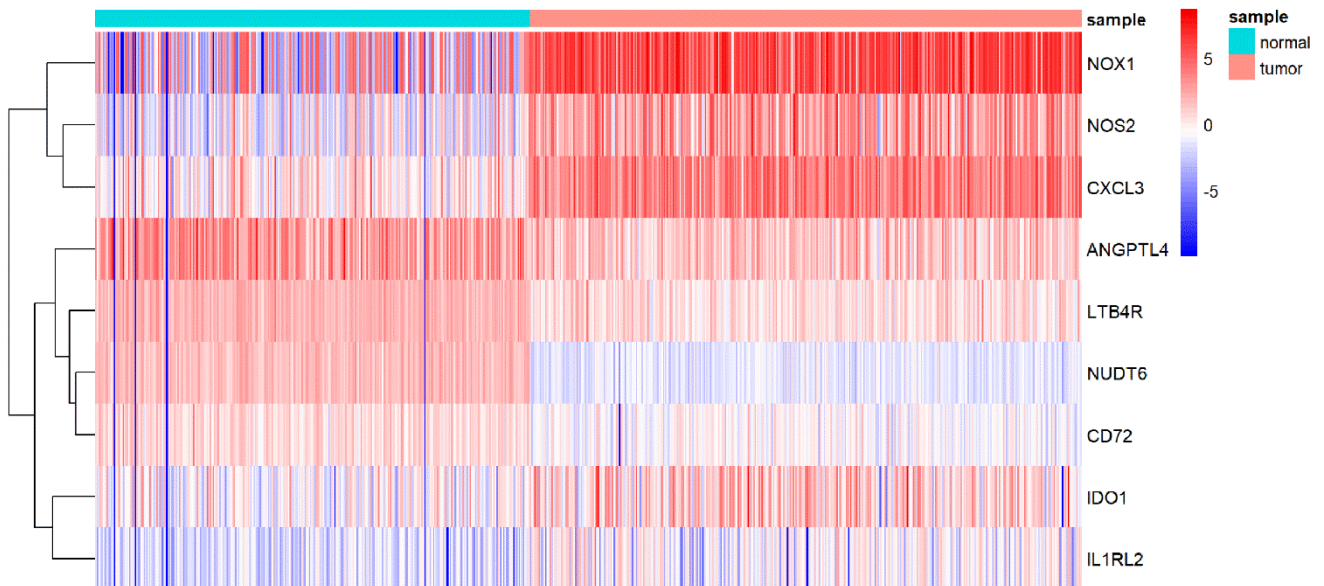

**Supplementary Figure S3.** Expression heatmap of 9 immune genes in healthy tissues and tumor tissues. The x-coordinate represents the sample, blue represents the healthy group sample, and pink represents the tumor group sample. The y-coordinate represents the gene. In the heatmap, the color changes from blue to red, representing a low gene expression level to a high gene expression level. The gene expression level is  $\log_2(\text{expression value})$ .
